# Supplementary material for: Nomogram Development and External Validation for Predicting the Risk of Lymph Node Metastasis in T1 Colorectal Cancer
Source: PubMed Central journal article supplement — Cancer Res Treat. 2019 Jan 17;51(4):1275–84. doi: 10.4143/crt.2018.569 (PMC6790837; doi:10.4143/crt.2018.569), 2019-01-17
Supplement: crt-2018-569-suppl1.pdf [file crt-2018-569-suppl1.pdf]

**S1 Table.** Specificity, sensitivity, NPV, and PPV of predicted LNM risk probability using the nomogram at each cut-off point from 5% to 15%, in units of 1%

| Predicted probability (%) | No. | ntrueN | ntrueP | ntestN | ntestP | Specificity | Sensitivity | NPV  | PPV  |
|---------------------------|-----|--------|--------|--------|--------|-------------|-------------|------|------|
| 5.0                       | 833 | 736    | 97     | 444    | 389    | 58.8        | 88.7        | 97.5 | 22.1 |
| 6.0                       | 833 | 736    | 97     | 444    | 389    | 58.8        | 88.7        | 97.5 | 22.1 |
| 7.0                       | 833 | 736    | 97     | 444    | 389    | 58.8        | 88.7        | 97.5 | 22.1 |
| 8.0                       | 833 | 736    | 97     | 461    | 372    | 61.0        | 87.6        | 97.4 | 22.9 |
| 9.0                       | 833 | 736    | 97     | 461    | 372    | 61.0        | 87.6        | 97.4 | 22.9 |
| 10.0                      | 833 | 736    | 97     | 514    | 319    | 67.4        | 81.4        | 96.5 | 24.8 |
| 11.0                      | 833 | 736    | 97     | 514    | 319    | 67.4        | 81.4        | 96.5 | 24.8 |
| 12.0                      | 833 | 736    | 97     | 514    | 319    | 67.4        | 81.4        | 96.5 | 24.8 |
| 13.0                      | 833 | 736    | 97     | 514    | 319    | 67.4        | 81.4        | 96.5 | 24.8 |
| 14.0                      | 833 | 736    | 97     | 514    | 319    | 67.4        | 81.4        | 96.5 | 24.8 |
| 15.0                      | 833 | 736    | 97     | 534    | 299    | 70.0        | 80.4        | 96.4 | 26.1 |

NPV, negative predicted value; PPV, positive predicted value; LNM, lymph node metastasis; ntrueN, number of actual lymph node metastasis; ntrueP, number of actual no lymph node metastasis; ntestN, number of lymph node metastasis predicted using prediction model; ntestP, number of no lymph node metastasis predicted using prediction model.
