# Supplementary material for: Nomogram Development and External Validation for Predicting the Risk of Lymph Node Metastasis in T1 Colorectal Cancer
Source: PubMed Central journal article supplement — Cancer Res Treat. 2019 Jan 17;51(4):1275–84. doi: 10.4143/crt.2018.569 (PMC6790837; doi:10.4143/crt.2018.569), 2019-01-17
Supplement: crt-2018-569-suppl2.pdf [file crt-2018-569-suppl2.pdf]

**S2 Table.** All combinations using 5 predictor variables

| No. | Value            |                     |                    |                   |               | Score            |                     |                    |                   |               | Total | Probability of LNM risk |
|-----|------------------|---------------------|--------------------|-------------------|---------------|------------------|---------------------|--------------------|-------------------|---------------|-------|-------------------------|
|     | Histologic grade | Submucosal invasion | Background adenoma | Vascular invasion | Tumor budding | Histologic grade | Submucosal invasion | Background adenoma | Vascular invasion | Tumor budding |       |                         |
| 1   | Low              | sm1                 | Yes                | No                | No            | 0                | 0                   | 0                  | 0                 | 0             | 0     | 0.0119                  |
| 2   | Low              | sm1                 | Yes                | No                | Yes           | 0                | 0                   | 0                  | 0                 | 25            | 25    | 0.0200                  |
| 3   | Low              | sm1                 | No                 | No                | No            | 0                | 0                   | 26                 | 0                 | 0             | 26    | 0.0206                  |
| 4   | Low              | sm2/sm3             | Yes                | No                | No            | 0                | 36                  | 0                  | 0                 | 0             | 36    | 0.0252                  |
| 5   | Low              | sm1                 | No                 | No                | Yes           | 0                | 0                   | 26                 | 0                 | 25            | 51    | 0.0344                  |
| 6   | Low              | sm2/sm3             | Yes                | No                | Yes           | 0                | 36                  | 0                  | 0                 | 25            | 61    | 0.0419                  |
| 7   | Low              | sm2/sm3             | No                 | No                | No            | 0                | 36                  | 26                 | 0                 | 0             | 62    | 0.0430                  |
| 8   | Low              | sm2/sm3             | No                 | No                | Yes           | 0                | 36                  | 26                 | 0                 | 25            | 87    | 0.0708                  |
| 9   | High             | sm1                 | Yes                | No                | No            | 97               | 0                   | 0                  | 0                 | 0             | 97    | 0.0870                  |
| 10  | Low              | sm1                 | Yes                | Yes               | No            | 0                | 0                   | 0                  | 100               | 0             | 100   | 0.0926                  |
| 11  | High             | sm1                 | Yes                | No                | Yes           | 97               | 0                   | 0                  | 0                 | 25            | 122   | 0.1390                  |
| 12  | High             | sm1                 | No                 | No                | No            | 97               | 0                   | 26                 | 0                 | 0             | 123   | 0.1421                  |
| 13  | Low              | sm1                 | Yes                | Yes               | Yes           | 0                | 0                   | 0                  | 100               | 25            | 125   | 0.1474                  |
| 14  | Low              | sm1                 | No                 | Yes               | No            | 0                | 0                   | 26                 | 100               | 0             | 126   | 0.1507                  |
| 15  | High             | sm2/sm3             | Yes                | No                | No            | 97               | 36                  | 0                  | 0                 | 0             | 133   | 0.1693                  |
| 16  | Low              | sm2/sm3             | Yes                | Yes               | No            | 0                | 36                  | 0                  | 100               | 0             | 136   | 0.1792                  |
| 17  | High             | sm1                 | No                 | No                | Yes           | 97               | 0                   | 26                 | 0                 | 25            | 148   | 0.2192                  |
| 18  | Low              | sm1                 | No                 | Yes               | Yes           | 0                | 0                   | 26                 | 100               | 25            | 151   | 0.2312                  |
| 19  | High             | sm2/sm3             | Yes                | No                | Yes           | 97               | 36                  | 0                  | 0                 | 25            | 158   | 0.2567                  |
| 20  | High             | sm2/sm3             | No                 | No                | No            | 97               | 36                  | 26                 | 0                 | 0             | 159   | 0.2617                  |
| 21  | Low              | sm2/sm3             | Yes                | Yes               | Yes           | 0                | 36                  | 0                  | 100               | 25            | 161   | 0.2700                  |
| 22  | Low              | sm2/sm3             | No                 | Yes               | No            | 0                | 36                  | 26                 | 100               | 0             | 162   | 0.2752                  |
| 23  | High             | sm2/sm3             | No                 | No                | Yes           | 97               | 36                  | 26                 | 0                 | 25            | 184   | 0.3753                  |
| 24  | Low              | sm2/sm3             | No                 | Yes               | Yes           | 0                | 36                  | 26                 | 100               | 25            | 187   | 0.3915                  |
| 25  | High             | sm1                 | Yes                | Yes               | No            | 97               | 0                   | 0                  | 100               | 0             | 197   | 0.4459                  |
| 26  | High             | sm1                 | Yes                | Yes               | Yes           | 97               | 0                   | 0                  | 100               | 25            | 222   | 0.5770                  |
| 27  | High             | sm1                 | No                 | Yes               | No            | 97               | 0                   | 26                 | 100               | 0             | 223   | 0.5834                  |

|    |      |         |     |     |     |    |    |    |     |    |     |        |
|----|------|---------|-----|-----|-----|----|----|----|-----|----|-----|--------|
| 28 | High | sm2/sm3 | Yes | Yes | No  | 97 | 36 | 0  | 100 | 0  | 233 | 0.6326 |
| 29 | High | sm1     | No  | Yes | Yes | 97 | 0  | 26 | 100 | 25 | 248 | 0.7035 |
| 30 | High | sm2/sm3 | Yes | Yes | Yes | 97 | 36 | 0  | 100 | 25 | 258 | 0.7448 |
| 31 | High | sm2/sm3 | No  | Yes | No  | 97 | 36 | 26 | 100 | 0  | 259 | 0.7497 |
| 32 | High | sm2/sm3 | No  | Yes | Yes | 97 | 36 | 26 | 100 | 25 | 284 | 0.8354 |

LNМ, lymph node metastasis.
